# Supplementary material for: Dynamics of Colon Monocyte and Macrophage Activation During Colitis
Source: Front Immunol. 2018 Nov 27;9:2764. doi: 10.3389/fimmu.2018.02764 (PMC6277765; doi:10.3389/fimmu.2018.02764)
Supplement: Supplementary Table 2 — Flow cytometry antibody details. [file Table_2.xlsx]

## Sheet: Sheet1
	Antibody	Fluorochrome	Clone	Organism	Dilution	Source
	CD3	APC	OKT3	Human	1/200	Biolegend
	CD19	APC	HIB19	Human	1/200	Biolegend
	CD20	APC	2H7	Human	1/200	Biolegend
	CD56	APC	MEM-188	Human	1/200	Biolegend
	CD45	A700	HI30	Human	1/200	Biolegend
	HLA DR	APCCy7	L243	Human	1/200	Biolegend
	CD11c	BV650	3.9	Human	1/200	Biolegend
	CD64	BV510	10.1	Human	1/200	Biolegend
	CD14	BV785	M5E2	Human	1/200	Biolegend
	CD163	PE Dazzle 594	GHI/61	Human	1/200	Biolegend
	CD68	PE	FA.11	Mouse	1/200	Biolegend
	CD45	BV510	30-F11	Mouse	1/400	BD biosciences
	TNF	BV421	MP6-XT22	Mouse	1/400	BD biosciences
	CD11c	BV605	N418	Mouse	1/600	BD biosciences
	CD11b	BV711	M1/70	Mouse	1/300	BD biosciences
	SiglecF	PE-CF594	E50-2440	Mouse	1/400	Biolegend
	CD64	PE	X54-5/7.1	Mouse	1/200	BD biosciences
	Ly6G	PerCP Cy5.5	1A8	Mouse	1/400	eBioscience
	Ly6C	A700	HK1.4	Mouse	1/400	eBioscience
	B220	e780	RA3-6B2	Mouse	1/200	BD biosciences
	CD3	e780	17A2	Mouse	1/200	BD biosciences
	CD11b	e780	M1/70	Mouse	1/200	BD biosciences
	Ly6G	APC/Cy7	1A8	Mouse	1/200	BD biosciences
	NK1.1	e780	PK136	Mouse	1/200	BD biosciences
	TCRb	e780	H57-597	Mouse	1/200	BD biosciences
	Ter119	e780	TER-119	Mouse	1/200	BD biosciences
	MerTk	Biotinylated	N/A	Mouse	1/100	Goat IgG RD systems
	F4/80	APC	BM8	Mouse	1/400	Biolegend
	MHC-II	FITC	M5/114.15.2	Mouse	1/800	BD biosciences
	IL-1b	FITC	NJTEN3	Mouse	1/200	BD biosciences
